# Supplementary material for: Exposing coordination-unsaturated Co sites in Co-MOF for efficient photocatalytic water oxidation
Source: Royal Society of Chemistry journal article supplement (doi:10.1039/d4qi00968a), 2024-01-01
Supplement: d4qi00968a1.pdf [file d4qi00968a1.pdf]

*Electronic Supplementary Information (ESI)*

**Exposing Coordination-Unsaturated Co sites in Co-MOF for  
Efficient Photocatalytic Water Oxidation**

Jie-Yi Zhou,<sup>a</sup> Xin-Yu Guan,<sup>a</sup> Hui-Ping Zhang,<sup>a</sup> Dong Luo,<sup>\*a</sup> Xusheng Wang,<sup>\*b,c</sup>

Xiao-Ping Zhou,<sup>\*a</sup> and Dan Li<sup>a</sup>

<sup>a</sup> *College of Chemistry and Materials Science, Guangdong Provincial Key Laboratory of Supramolecular Coordination Chemistry, Jinan University, Guangzhou 510632, P. R. China.*

*E-mail: luodong@jnu.edu.cn, zhouxp@jnu.edu.cn*

<sup>b</sup> *Institute of Functional Porous Materials, School of Materials Science and Engineering, Zhejiang Sci-Tech University, Hangzhou 310018, P. R. China.*

*E-mail: xswang@zstu.edu.cn*

<sup>c</sup> *Key Laboratory of Green Cleaning Technology & Detergent of Zhejiang Province, Lishui, Zhejiang, 323000, P. R. China*

## Ligand synthesis

The ligand 1,2-bis((5H-imidazol-4-yl)methylene)hydrazine (H<sub>2</sub>BIM) was prepared by the reported method.<sup>S1</sup>

## Crystallographic studies

Single crystal structures of **CoBIM-1** and **CoBIM-2** were measured by X-ray diffraction. Data collection were performed on an Agilent Technologies Gemini A System (Cu K $\alpha$ ,  $\lambda = 1.54178 \text{ \AA}$ ; Mo K $\alpha$ ,  $\lambda = 0.71073 \text{ \AA}$ ). Crystals of **CoBIM-1** and **CoBIM-2** were measured at 100 K. The data were processed using CrysAlis<sup>Pro.1</sup>. The structures were solved by direct methods and refined by full-matrix least-squares refinements based on  $F_2$ . Anisotropic thermal parameters were applied to all non-hydrogen atoms. The hydrogen atoms were generated geometrically. The crystallographic calculations were conducted using SHELXL-2018/3 program. All the crystal structures contain lots of unknow residual electron density belong to solvent molecules. The treatment for the solvent molecules in the cavities involves the use of the SQUEEZE program of PLATON, which can provide a better refinement data. A summary of crystal data and structure refinement parameters is listed in Tables S1.

**Table S1.** Crystal data and structure refinement parameters for **CoBIM-1** and **CoBIM-2**

| Parameter                                                        | CoBIM-1                                          | CoBIM-2                                                         |
|------------------------------------------------------------------|--------------------------------------------------|-----------------------------------------------------------------|
| Chemical formula                                                 | C <sub>8</sub> H <sub>8</sub> N <sub>6</sub> OCo | C <sub>24</sub> H <sub>18</sub> N <sub>18</sub> Co <sub>2</sub> |
| Formula weight                                                   | 263.13                                           | 676.42                                                          |
| Temperature (K)                                                  | 100(2)                                           | 100(2)                                                          |
| Crystal system                                                   | cubic                                            | cubic                                                           |
| Space group                                                      | <i>Ia-3d</i>                                     | <i>Im-3</i>                                                     |
| <i>a</i> (Å)                                                     | 32.7620(3)                                       | 23.6941(6)                                                      |
| <i>b</i> (Å)                                                     | 32.7620(3)                                       | 23.6941(6)                                                      |
| <i>c</i> (Å)                                                     | 32.7620(3)                                       | 23.6941(6)                                                      |
| $\alpha$ (deg)                                                   | 90.00                                            | 90.00                                                           |
| $\beta$ (deg)                                                    | 90.00                                            | 90.00                                                           |
| $\gamma$ (deg)                                                   | 90.00                                            | 90.00                                                           |
| Volume (Å <sup>3</sup> )                                         | 35165.1(10)                                      | 13302.1(10)                                                     |
| <i>Z</i>                                                         | 96                                               | 16                                                              |
| <i>D</i> <sub>calcd</sub> (g cm <sup>-3</sup> )                  | 1.193                                            | 1.351                                                           |
| $\mu$ (mm <sup>-1</sup> )                                        | 9.136                                            | 8.189                                                           |
| Reflections collected                                            | 15378                                            | 5829                                                            |
| Unique reflections                                               | 2116                                             | 1984                                                            |
| <i>R</i> <sub>int</sub>                                          | 0.0356                                           | 0.0876                                                          |
| Goodness-of-fit on <i>F</i> <sup>2</sup>                         | 1.086                                            | 1.011                                                           |
| <i>R</i> <sub>1</sub> <sup>a</sup> [ <i>I</i> > 2σ( <i>I</i> )]  | 0.0738                                           | 0.0587                                                          |
| <i>wR</i> <sub>2</sub> <sup>b</sup> [ <i>I</i> > 2σ( <i>I</i> )] | 0.2201                                           | 0.1240                                                          |
| <i>R</i> <sub>1</sub> <sup>a</sup> [all refl.]                   | 0.0864                                           | 0.1411                                                          |
| <i>wR</i> <sub>2</sub> <sup>b</sup> [all refl.]                  | 0.2315                                           | 0.1496                                                          |
| <i>CCDC number</i>                                               | 2203264                                          | 2204131                                                         |

$$^a R_1 = \sum(|F_o| - |F_c|) / \sum|F_o|; \quad ^b wR_2 = [\sum w(F_o^2 - F_c^2)^2 / \sum w(F_o^2)^2]^{1/2}$$

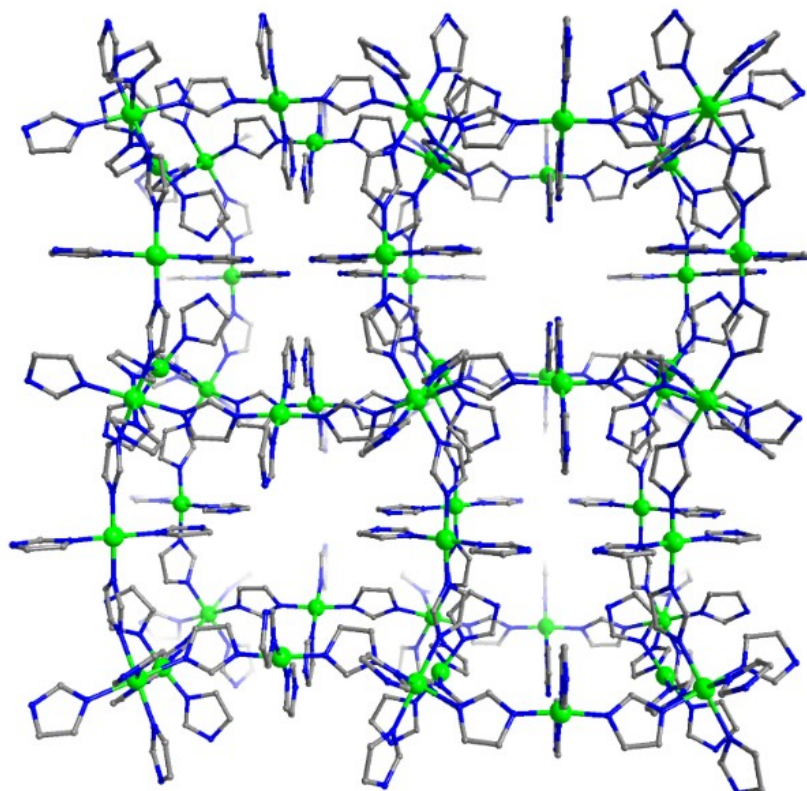

**Figure S1.** The simplified crystal structure of **CoBIM-2** (only include imidazole parts and cobalt atoms). Colour codes: Co green, N blue, and C grey.

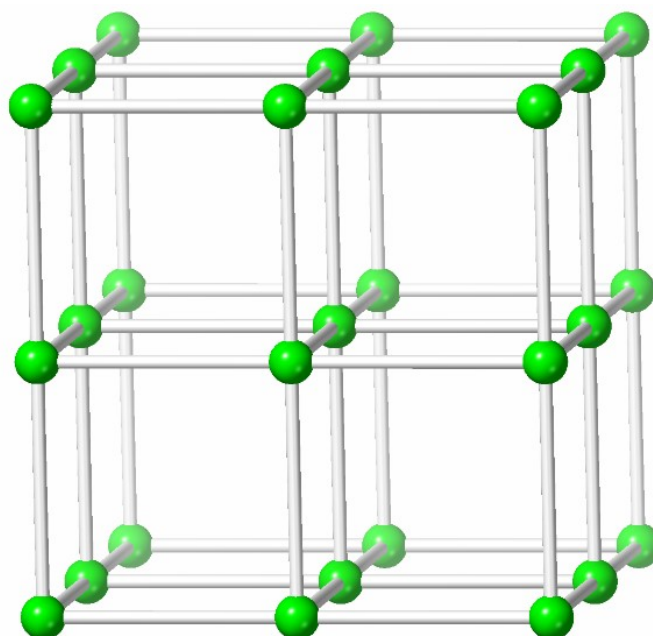

**Figure S2.** The **pcu** topology of **CoBIM-2**.

## Additional Characterizations

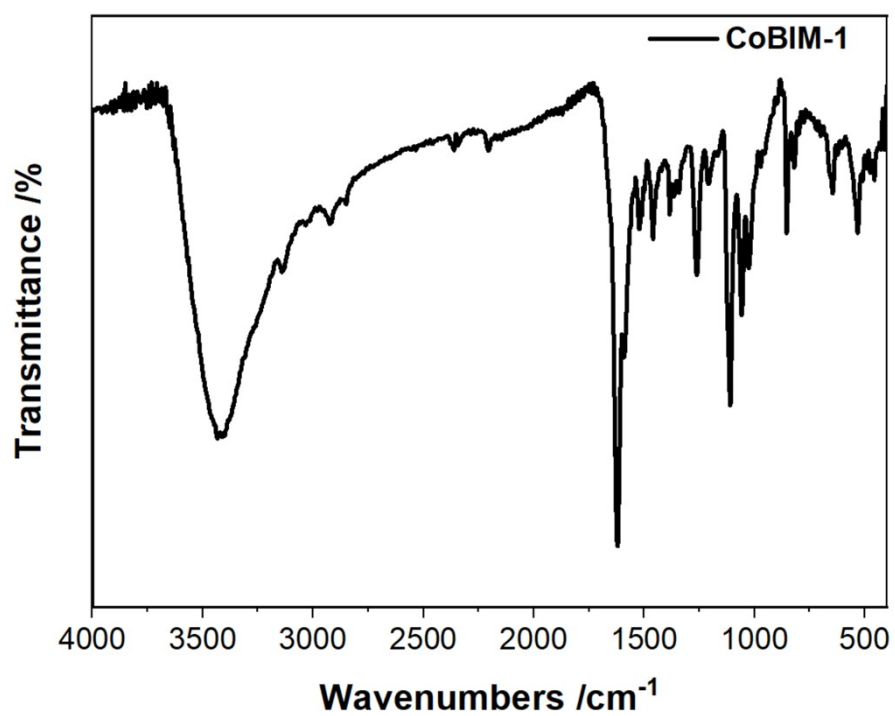

Figure S3. FT-IR spectrum of CoBIM-1.

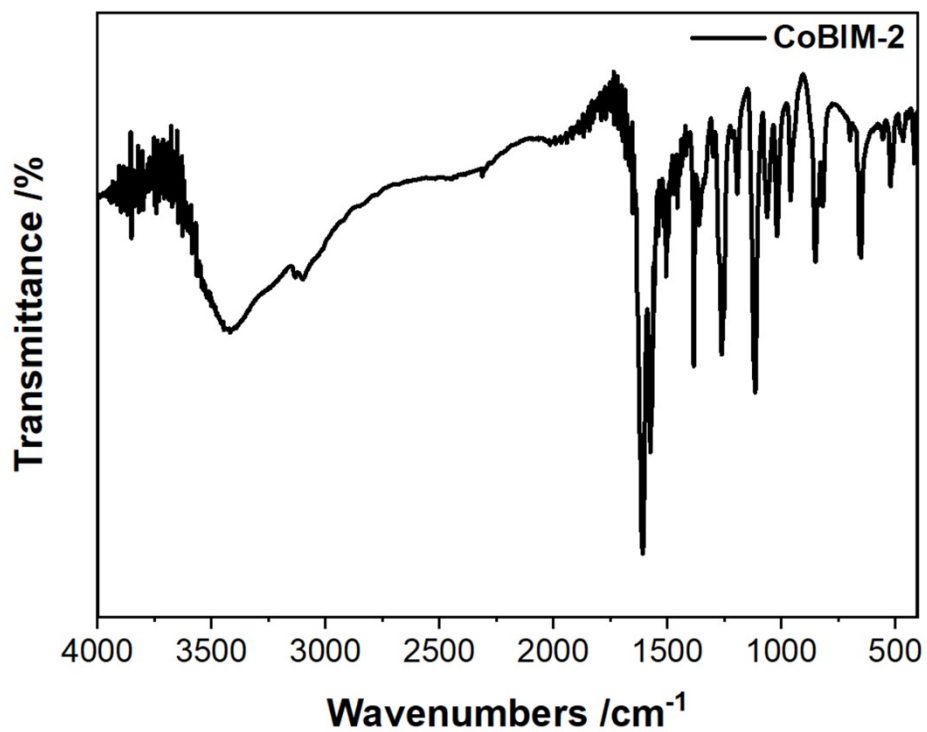

Figure S4. FT-IR of CoBIM-2.

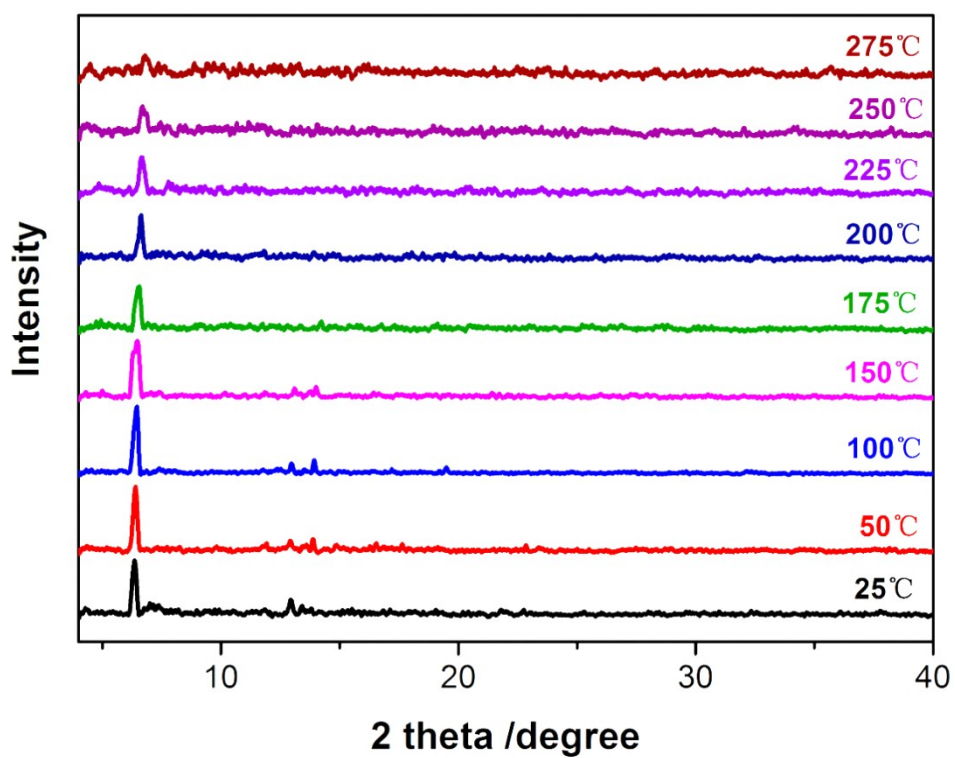

**Figure S5.** The variable temperature PXRD patterns of CoBIM-1 in an air atmosphere.

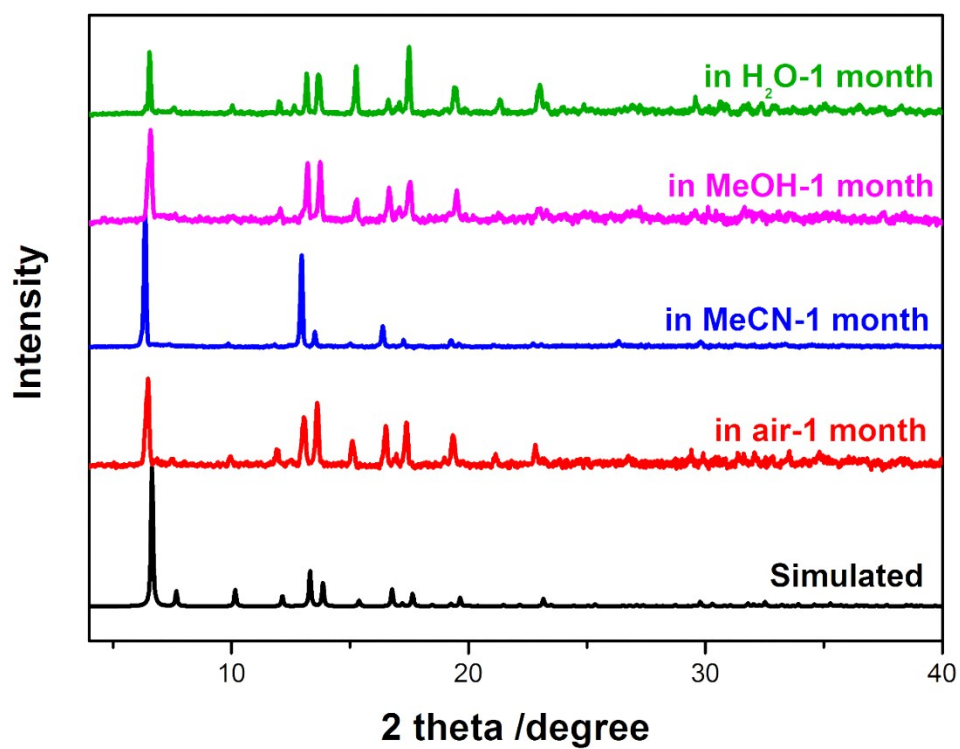

**Figure S6.** The PXRD patterns of CoBIM-1 immersed in different solvents for one month at room temperature.

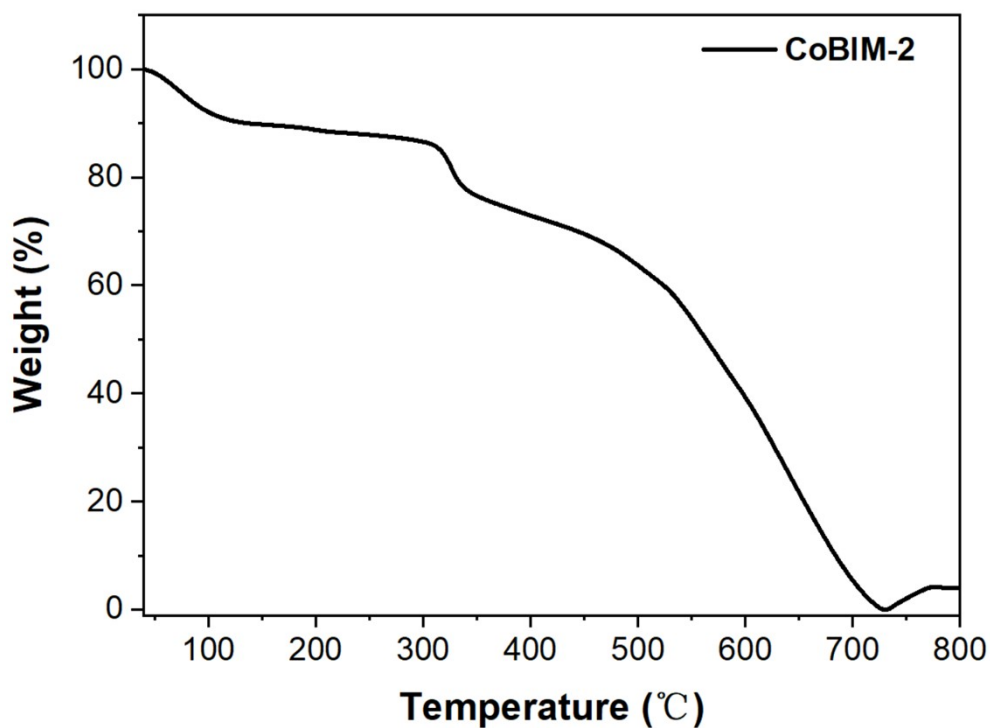

**Figure S7.** TGA plot of **CoBIM-2** in a  $N_2$  atmosphere.

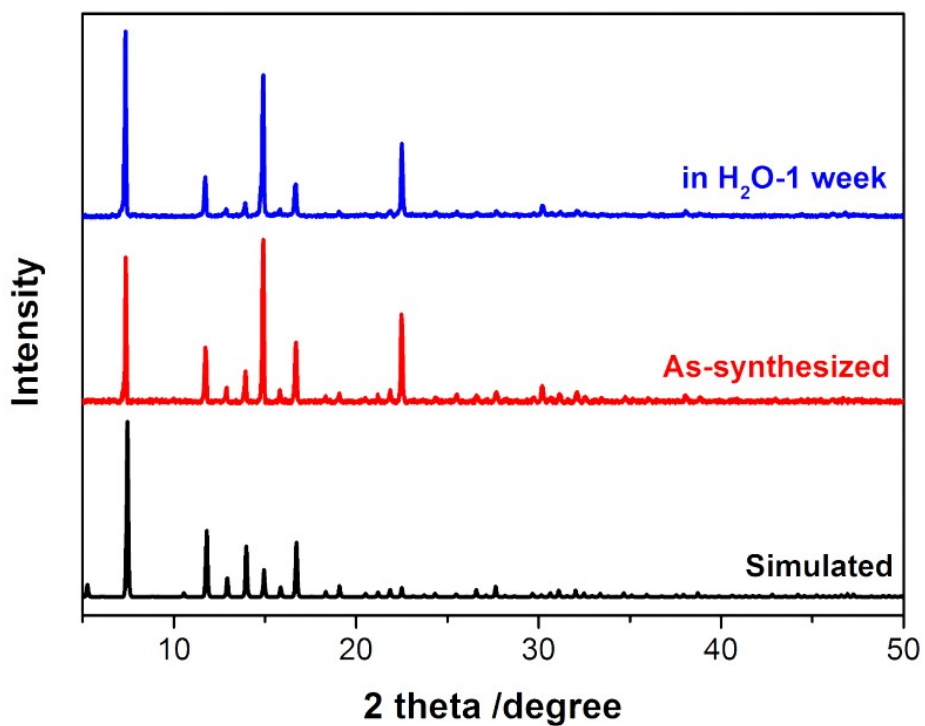

**Figure S8.** Powder X-ray diffraction patterns (PXRD,  $Cu\ K\alpha$ ,  $\lambda = 1.5418\ \text{\AA}$ ) of simulated, as-synthesized, and water immersed (for one week) **CoBIM-2** at room temperature.

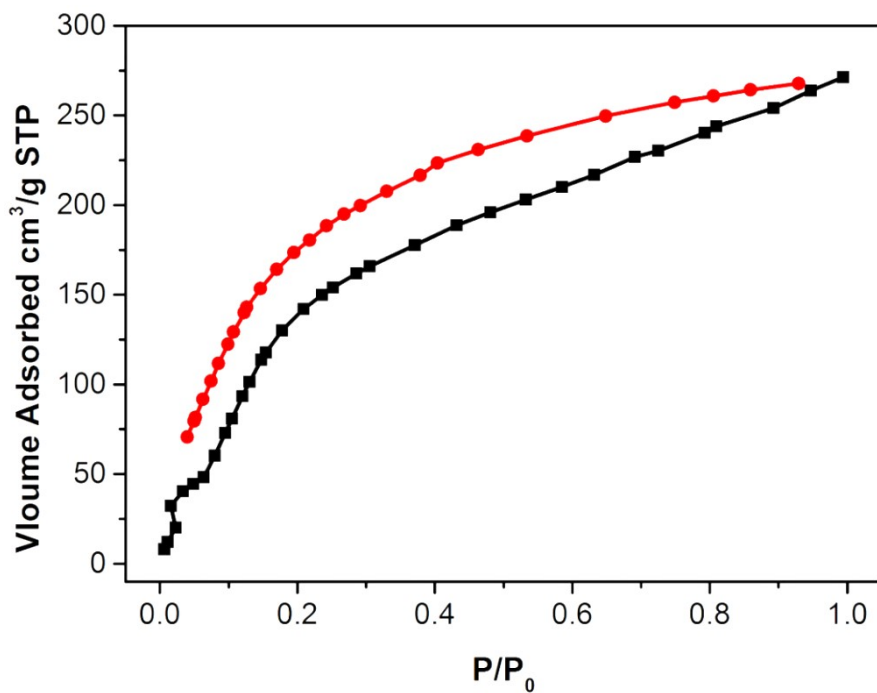

**Figure S9.** H<sub>2</sub>O adsorption and desorption isotherms of **CoBIM-1** at 298K. The solid black squares and red circles represent adsorption and desorption isotherms, respectively.

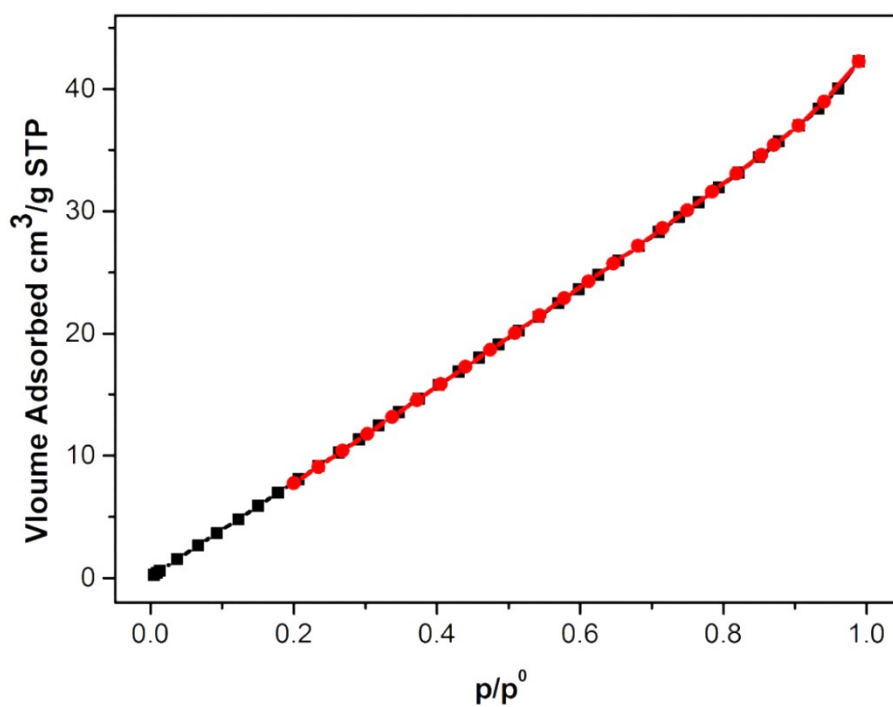

**Figure S10.** N<sub>2</sub> adsorption and desorption isotherms of **CoBIM-2** at 77 K. The solid black squares and red circles represent adsorption and desorption isotherms, respectively.



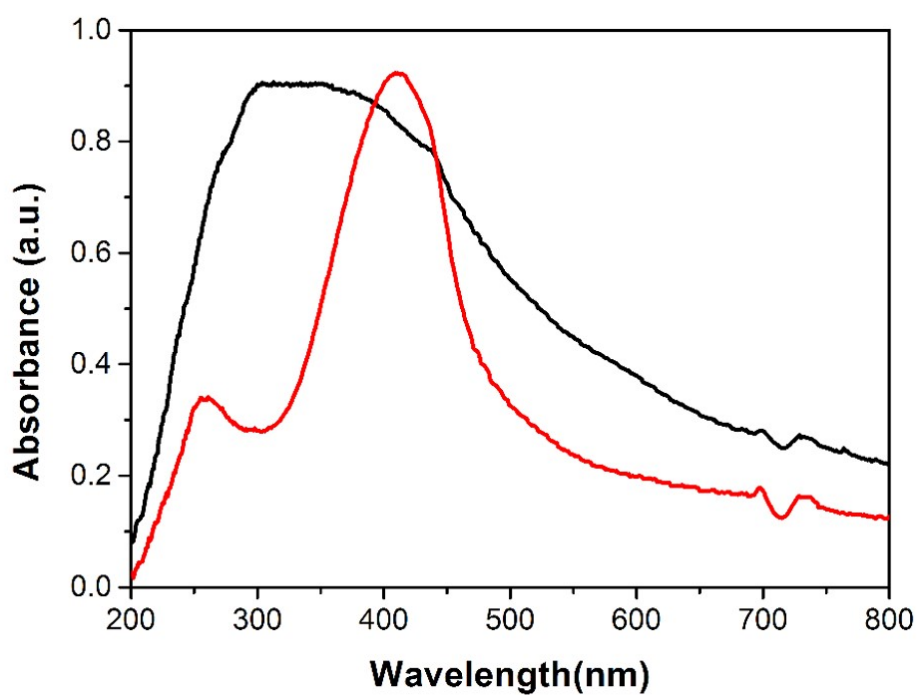

**Figure S11.** The solid-state UV-vis absorption spectra of **CoBIM-1** (black line) and **CoBIM-2** (red line), respectively.

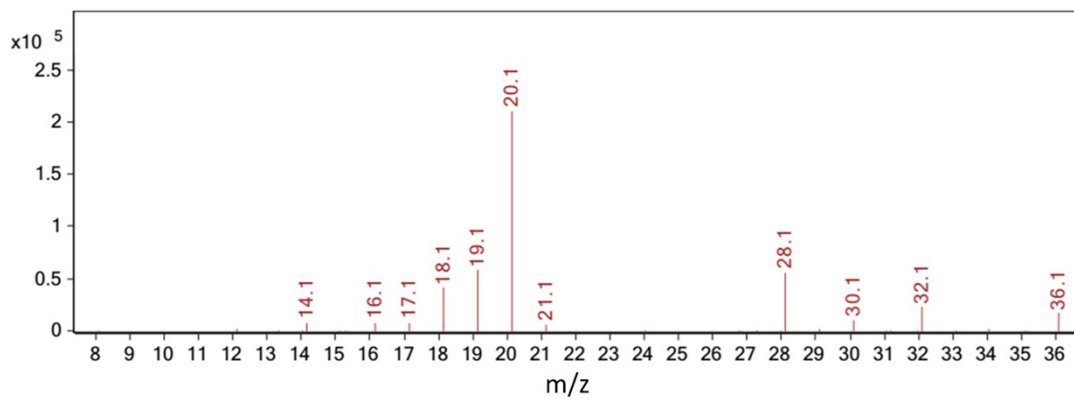

**Figure S12.** The GC-MS data from the photocatalytic water oxidation experiment using **CoBIM-1** as a catalyst and  $\text{H}_2^{18}\text{O}$  as the solvent for a reaction time of 90 minutes.

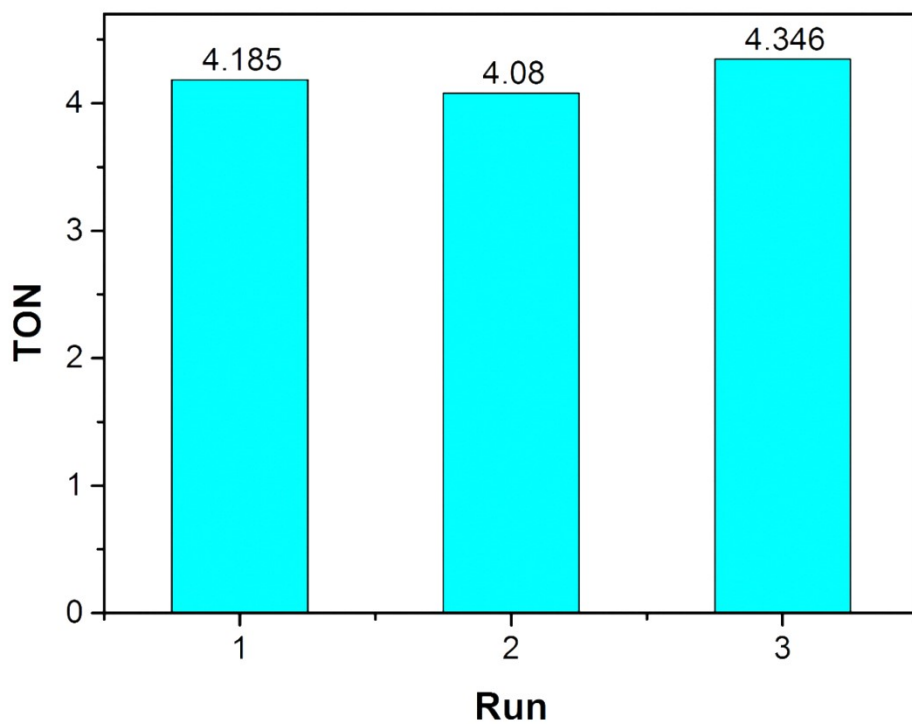

Figure S13. The TON of CoBIM-1 during three catalytic runs.

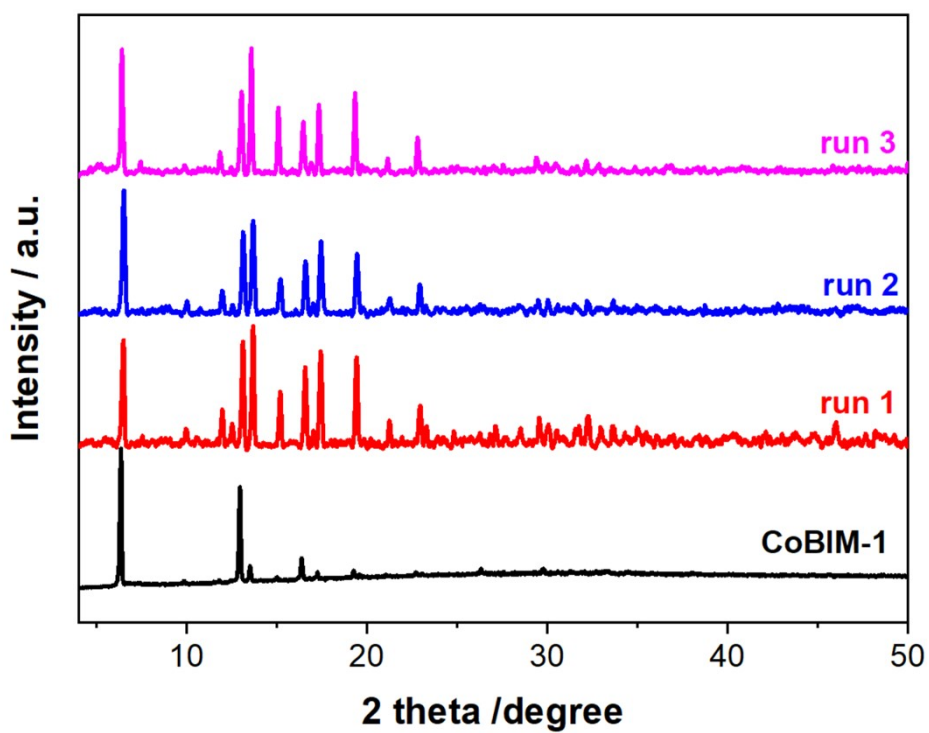

Figure S14. The PXRD patterns of CoBIM-1 during three catalytic runs.

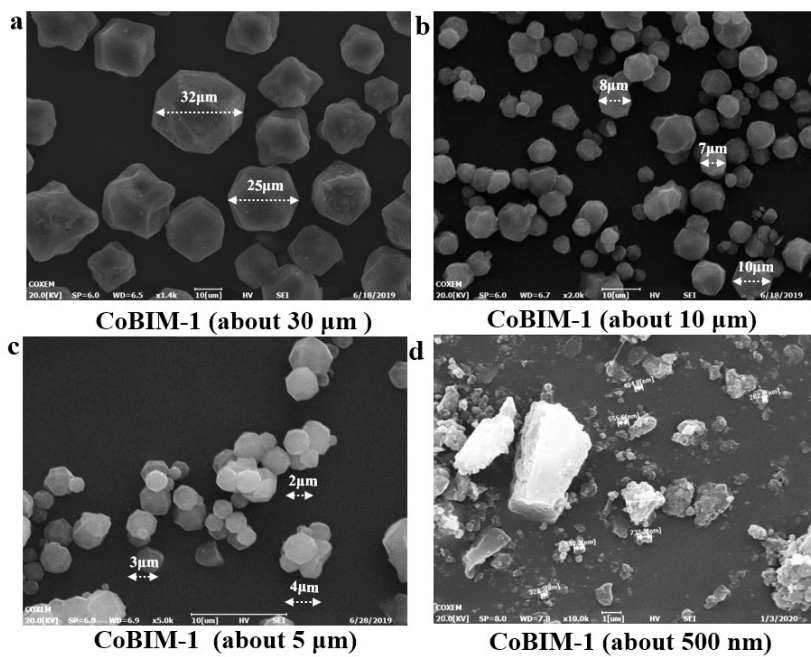

**Figure S15.** The SEM of CoBIM-1 with size of around (a) 30  $\mu\text{m}$ , (b) 10  $\mu\text{m}$ , (c) 5  $\mu\text{m}$ , and (d) 500 nm.

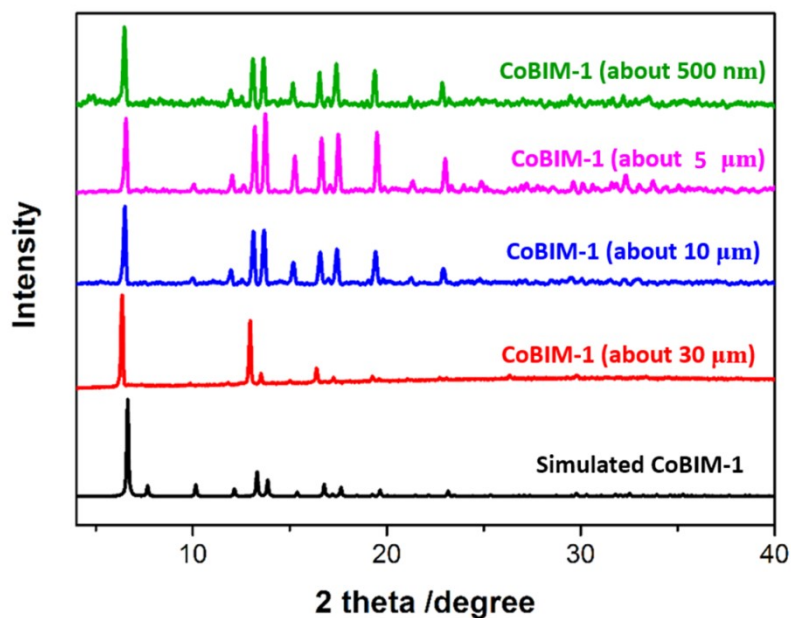

**Figure S16.** The PXRD patterns of CoBIM-1 with different size.

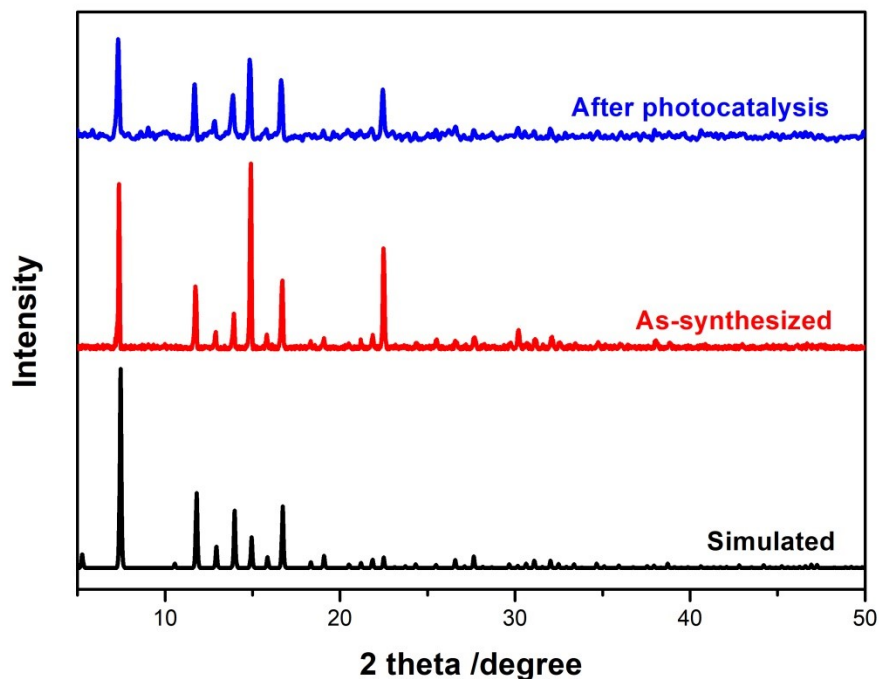

**Figure S17.** Powder X-ray diffraction patterns (PXRD, Cu K $\alpha$ ,  $\lambda = 1.5418 \text{ \AA}$ ) of simulated, as-synthesized, and after photocatalyzed **CoBIM-2** at room temperature.

**Table S2.** The O<sub>2</sub> evolution and turnover number (TON) of **CoBIM-1** with different particle sizes

| Catalysts                                | O <sub>2</sub> ( $\mu\text{mol}$ ) | TON |
|------------------------------------------|------------------------------------|-----|
| <b>CoBIM-1</b>                           | 40.0                               | 4.2 |
| <b>CoBIM-1</b> (about 10 $\mu\text{m}$ ) | 50.6                               | 5.3 |
| <b>CoBIM-1</b> (about 5 $\mu\text{m}$ )  | 51.3                               | 5.4 |
| <b>CoBIM-1</b> (about 500 nm)            | 51.6                               | 5.4 |

Conditions: degassed borate buffer solution, 10 mL; catalysts, 10 mg; Ru(bpy)<sub>3</sub>Cl<sub>2</sub>, 6 mM; Na<sub>2</sub>S<sub>2</sub>O<sub>8</sub>, 30 mM; reaction time, 2 h; pH, 8.2; light source, 470 nm LED.

## Reference

S1 X.-P. Zhou, M. Li, J. Liu and D. Li, Gyroidal metal–organic frameworks, *J. Am. Chem. Soc.* 2012, **134**, 67-70.
